# Supplementary material for: Associations of Religious Upbringing With Subsequent Health and Well-Being From Adolescence to Young Adulthood: An Outcome-Wide Analysis
Source: PubMed Central journal article supplement — Am J Epidemiol. 2018 Sep 10;187(11):2355–64. doi: 10.1093/aje/kwy142 (PMC6211237; doi:10.1093/aje/kwy142), 2018-09-10
Supplement: kwy142_chenwebmaterialfinalrevised.pdf [file kwy142_chenwebmaterialfinalrevised.pdf]

**Associations of Religious Upbringing With Subsequent Health and Well-Being From  
Adolescence to Young Adulthood: An Outcome-Wide Analysis**

Ying Chen, and Tyler J. VanderWeele

Table of Contents

---

|              |                                                                                                                                                                                                                                                                                                   |
|--------------|---------------------------------------------------------------------------------------------------------------------------------------------------------------------------------------------------------------------------------------------------------------------------------------------------|
| Web Appendix | Outcome assessment                                                                                                                                                                                                                                                                                |
| Web Table 1  | Baseline characteristics of participants remained in the cohort and participants lost to follow-up in GUTS 2010 questionnaire wave, among participants who had valid data on religious service attendance or prayer/meditation at baseline (Growing Up Today Study 1999-2010 questionnaire wave). |
| Web Table 2  | Timing of assessment of all variables in this study (Growing Up Today Study, Nurses Health Study II)                                                                                                                                                                                              |
| Web Table 3  | Assessment of all outcome variables in this study (Growing Up Today Study)                                                                                                                                                                                                                        |
| Web Table 4  | Distribution of participant characteristics in the full analytic sample for analyses on religious service attendance (Growing Up Today Study, N=10,813)                                                                                                                                           |
| Web Table 5  | Distribution of participant characteristics in the full analytic sample for analyses on prayer or meditation (Growing Up Today Study, N=10,789)                                                                                                                                                   |
| Web Table 6  | Distribution of participant characteristics by frequency of prayer or meditation at study baseline (Growing Up Today Study 1999 questionnaire wave, N=10,789)                                                                                                                                     |
| Web Table 7  | Religious service attendance, prayer or meditation in adolescence and health and well-being in young adulthood (Growing Up Today Study 1999 to 2007, 2010 or 2013 questionnaire wave, N ranged from 5,669 to 7,431)                                                                               |
| Web Table 8  | Prayer or meditation in adolescence and health and well-being in young adulthood, adjusting for adulthood religious service attendance in 2005 as a sensitivity analysis (Growing Up Today Study 1999 to 2007, 2010 or 2013 questionnaire wave, N ranged from 5,681 to 7,448)                     |

---

---

## WEB APPENDIX

### Outcome assessment

*Life satisfaction.* Life satisfaction over the past month was assessed with one item from the validated Rand Mental Health Inventory (1) (i.e., “Have you felt happy, satisfied or please with your personal life”) (GUTS 2010). Response cries ranged from 1: none of the time to 6: all of the time. The response was considered as a continuous variable (mean=4.44, SD=1.02).

*Positive affect.* Positive affect over the past month was assessed with 10 items from the validated Rand Mental Health Inventory (1) (e.g., “Did you feel relaxed and free of tension”) (GUTS 2010). Responses ranged from 1 (none of the time) to 6 (all of the time). An overall score was calculated by summing responses across all items ( $\alpha = 0.94$ ), ranging from 10 to 60 (mean=39.99, SD=8.74).

*Self-esteem.* Self-esteem was measured with the validated Rosenberg Self-esteem Scale (2, 3) which assessed participants’ positive and negative feelings towards oneself (e.g., “I am able to do things as well as most other people”, “I certainly feel useless at times”) (GUTS 2010). Response options ranged from 1 (strongly agree) to 4 (strongly disagree). Items were reverse coded as necessary such that a higher score reflected greater self-esteem. An overall score was created by summing responses across items ( $\alpha = 0.91$ , mean=33.71, SD=4.97, range = 10 to 40).

*Emotional processing.* The 4-item Emotional Processing Subscale from the validated Emotional Approach Coping Scale (4) was used to measure emotional processing (GUTS 2010). The subscale assessed the extent to which individuals seek to understand their emotions under stress (e.g., “I realize that my feelings are valid and important”). Response options ranged from 1 (not at all) to 4 (a lot). Items were summed to create an overall score with higher scores indicating greater emotional processing ( $\alpha = 0.84$ , mean=11.22, SD=2.76, range =4 to 16).

*Emotional expression.* The 4-item Emotional Expression Subscale from the validated Emotional Approach Coping Scale (4) was used to assess emotional expression (GUTS 2010). The subscale measured the extent to which participants seek to express their emotions in stressful situations (e.g., “I feel free to express my emotions”). Response options ranged from 1 (not at all) to 4 (a lot). Responses were summed across items to create an overall score, with higher scores indicating greater emotional expression ( $\alpha = 0.91$ , mean=10.64, SD=3.02, range =4 to 16).

Character/virtue

*Frequency of volunteering.* One question was used to assess frequency of volunteer work: “In an average month, how many hours do you spend on volunteer work, community service, or helping people outside of your home without getting paid” (GUTS 2007). The response options ranged from 1 (0 hour) to 4 (10 or more hours). The response was used as a continuous variable.

*Sense of mission.* Sense of mission was measured with a single item: “I have a sense of mission or calling in my own life”. Response ranged from 1 (strongly agree) to 4 (strongly disagree) (GUTS 2007). The response was reverse coded so that higher scores reflected greater sense of mission. The responses were used as a continuous variable.

*Forgiveness of others.* Participants were asked to report to what extent they forgave others in response to the question: “Because of my spiritual or religious beliefs, I have forgiven those who hurt me” (GUTS 2007). Response categories ranged from 1 (always or almost always) to 4 (never). Responses were reverse coded so that higher scores reflected higher levels of forgiveness of others. The response was used as a continuous variable.

*Registered to vote.* Participants were asked to report whether they were currently registered to vote (yes, no) (GUTS 2007).

*Number of physical health problems.* Participants self-reported whether they had been told by a health care provider that they had the following conditions (yes, no) (GUTS 2010): cancer, diabetes, high cholesterol, high blood pressure and asthma. A summary score was created as the total number of reported conditions (mean=0.36, SD=0.59, range = 0 to 3).

*Overweight or obese.* The body mass index was calculated based on self-reported height (inches) and weight (pounds) (GUTS 2010). Overweight or obese was defined as BMI  $\geq$  25 kg/m<sup>2</sup> (5).

*Depression.* Depressive symptoms over the past week (GUTS 2010) was assessed with the validated Center for Epidemiologic Studies Depression Scale (CES-D) (e.g., “I felt depressed”) (6). Response options ranged from 0 (rarely or none of the time) to 3 (all of the time). Items were reverse scored as necessary with higher scores indicating more depressive symptoms, and were summed to create an overall score ( $\alpha = 0.81$ , mean=7.25, SD=4.63, range =0 to 30). Participants also reported whether they have ever received a diagnosis of depression (GUTS 2013).

*Anxiety.* Nine items from the Worry/Sensitivity Subscale of the validated Revised Children’s Manifest Anxiety Scale (RCMAS) were used to assess anxiety symptoms over the past week (e.g., “I worry a lot of the time”) (GUTS 2010). Response options ranged from 0 (none of the time) to 5 (all of the time). Items were summed to create an overall score of anxiety symptoms ( $\alpha=0.93$ , mean=22.30, SD=8.36, range=9 to 54). Participants also reported whether they have ever received a diagnosis of anxiety disorder.

*Probable post-traumatic stress disorder (PTSD).* The validated Breslau’s 7-item short screening scale (7) was used to measure lifetime PTSD symptoms (GUTS 2007), in which symptoms of PTSD related to a most distressing event in their life were reported. A conservative

cutoff of 6 or more symptoms was used as the cutoff for probable PTSD, as the prevalence was high in this cohort using the traditional cutoff of 4 or more symptoms (7, 8).

*Cigarette smoking.* Cigarette smoking over the past year was queried (GUTS 2010): “In the past 12 months, have you smoked a cigarette” (yes, no).

*Frequent binge drinking.* A single question was used to assess binge drinking over the past year (GUTS 2010): “In the past 12 months, how many times did you drink 5 (male)/4 (female) or more alcoholic drinks over a few hours”. Response categories ranged from 1 (never) to 10 (37 or more times). Participants who reported at least 12 episodes of binge drinking (7: 12 to 15 times to 10: 37 or more times) were considered as frequent binge drinkers (9).

*Marijuana use.* Lifetime marijuana use was queried with a single question (GUTS 2010): “Have you ever used marijuana” (yes/no).

*Illicit drug use other than marijuana.* Lifetime use of other illicit drugs including cocaine or crack, heroin, ecstasy, LSD/mushrooms or any other hallucinogen, crystal meth, or other amphetamines was also queried (GUTS 2010). Those who reported using any of the drugs were considered as having illicit drug use (yes, no).

*Prescription drug misuse.* Lifetime use of the following drugs without a doctor’s prescription was queried: tranquilizers, pain killers, sleeping pills and stimulants (GUTS 2010). Those who reported use of any of the drugs were considered as having prescription drug use (yes, no).

*Number of lifetime sexual partners.* Lifetime history of sexual intercourse was queried (GUTS 2007), and the response options included “yes”, “no” and “not sure”. Those who reported “yes” or “not sure” further reported the number of their lifetime sexual partners: “During your life, with how many people have you had sexual intercourse”. Response categories ranged from

1 (1 person) to 8 (21 or more people). Participants who reported never had sexual intercourse were coded as having 0 sexual partners. The response was used as a continuous variable (mean=3.11, SD=2.58, range=0 to 8).

*Early sexual initiation.* Participants who reported ever had sexual intercourse or “not sure” were further asked to report the age when they had sexual intercourse for the first time (GUTS 2007). Response options ranged from 1 (13 years or younger) to 9 (21 years or older). Participants who reported sexual initiation at year 15 years or younger were considered as having early sexual initiation (yes, no) (10).

*Sexually transmitted infections (STIs).* Participants were asked to report whether they ever received a diagnosis of chlamydia, HPV, genital warts or any STIs (GUTS 2013). Those who reported any of the conditions were considered as having STIs diagnosis (yes, no).

*Teen pregnancy.* Participants who reported ever been pregnant (for female) or ever impregnated a woman (for male) were further asked to recall the calendar year when their/their partner’s first pregnancy ended (GUTS 2010). The age of pregnancy was calculated by subtracting the participant’s/their partner’s birth year from the year of pregnancy. Teen pregnancy was defined as pregnancy before the age of 20 (11).

*Abnormal Pap test.* Participants reported whether they ever had a Pap test (no, yes, not sure) (GUTS, 2007). Those who reported “yes” or “not sure” were asked to respond to a second question “Have you been told by a doctor or other health care provider that you had an abnormal Pap test?”. Response categories were “yes”, “no” or “not sure”. Those who reported “yes” were considered as having abnormal Pap test, whereas those who reported “no” were coded as not having abnormal Pap test.

## REFERENCES

1. *Conceptualization and measurement of health for adults in the health insurance study.* Rand Corporation; 1979.
2. Sinclair SJ, Blais MA, Gansler DA, et al. Psychometric Properties of the Rosenberg Self-Esteem Scale: Overall and Across Demographic Groups Living Within the United States. *Evaluation & the Health Professions* 2010;33(1):56-80.
3. Rosenberg M. *Society and the Adolescent Self-image.* Princeton, New Jersey: Princeton University Press; 1965.
4. Stanton AL, Kirk SB, Cameron CL, et al. Coping through emotional approach: scale construction and validation. *J Pers Soc Psychol* 2000;78(6):1150-1169.
5. WHO. Physical status: the use and interpretation of anthropometry. Report of a WHO Expert Committee. *World Health Organ Tech Rep Ser*, 1995:1-452.
6. Andresen EM, Malmgren JA, Carter WB, et al. Screening for depression in well older adults: evaluation of a short form of the CES-D (Center for Epidemiologic Studies Depression Scale). *Am J Prev Med* 1994;10(2):77-84.
7. Breslau N, Peterson EL, Kessler RC, et al. Short screening scale for DSM-IV posttraumatic stress disorder. *Am J Psychiatry* 1999;156(6):908-911.
8. Roberts AL, Rosario M, Corliss HL, et al. Childhood gender nonconformity: a risk indicator for childhood abuse and posttraumatic stress in youth. *Pediatrics* 2012;129(3):410-417.
9. Field AE, Sonneville KR, Crosby RD, et al. Prospective associations of concerns about physique and the development of obesity, binge drinking, and drug use among adolescent boys and young adult men. *JAMA Pediatrics* 2014;168(1):34-39.
10. Dodson NA, Corliss HL, Sarda V, et al. Sense of Mission and Sexual Health Outcomes Among Young Adult Women. *Journal of Pediatric and Adolescent Gynecology*;29(6):567-570.
11. Charlton BM, Corliss HL, Missmer SA, et al. Sexual orientation differences in teen pregnancy and hormonal contraceptive use: an examination across 2 generations. *Am J Obstet Gynecol* 2013;209(3):204 e201-208.

**Web Table 1. Baseline characteristics of participants remained in the cohort and participants lost to follow-up in GUTS 2010 questionnaire wave, among participants who had valid data on religious service attendance or prayer/meditation at baseline (Growing Up Today Study 1999-2010 questionnaire wave).**

|                                                     | Followed<br>(n=6,950) | Lost to follow-up<br>(n=3,879) | P <sup>a</sup> |
|-----------------------------------------------------|-----------------------|--------------------------------|----------------|
| Religious service attendance                        |                       |                                | 0.01           |
| Never, %                                            | 14.97                 | 17.15                          |                |
| Less than once/week, %                              | 27.21                 | 26.69                          |                |
| At least once/week, %                               | 57.82                 | 56.16                          |                |
| Prayer or meditation                                |                       |                                | <0.001         |
| Never, %                                            | 16.57                 | 20.31                          |                |
| Less than once/week, %                              | 17.98                 | 18.81                          |                |
| 1-6 times/week, %                                   | 28.00                 | 27.38                          |                |
| At least once/day, %                                | 37.45                 | 33.50                          |                |
| Age, mean (SD)                                      | 14.81 (1.67)          | 14.61 (1.65)                   | <0.001         |
| Boy, %                                              | 33.27                 | 55.27                          | <0.001         |
| White, %                                            | 93.31                 | 93.35                          | 0.93           |
| Geographic region                                   |                       |                                | <0.001         |
| West, %                                             | 16.10                 | 13.12                          |                |
| Midwest, %                                          | 35.78                 | 35.09                          |                |
| South, %                                            | 14.26                 | 14.79                          |                |
| Northeast, %                                        | 33.86                 | 37.00                          |                |
| Mother's age, mean (SD)                             | 44.25 (3.54)          | 43.92 (3.60)                   | <0.001         |
| Mother's race (white), %                            | 97.44                 | 97.03                          | 0.21           |
| Mother married, %                                   | 92.56                 | 91.67                          | 0.10           |
| Mother's subjective SES in the US, mean (SD)        | 7.21 (1.30)           | 7.02 (1.30)                    | <0.001         |
| Mother's subjective SES in the community, mean (SD) | 7.07 (1.55)           | 6.93 (1.56)                    | <0.001         |
| Pretax household income                             |                       |                                | <0.001         |
| <\$50,000, %                                        | 12.22                 | 14.67                          |                |
| \$50,000-\$74,999, %                                | 22.89                 | 25.46                          |                |
| \$75,000-\$99,999, %                                | 21.95                 | 23.68                          |                |
| ≥\$100,000, %                                       | 42.93                 | 36.19                          |                |
| Census tract college education rate, mean (SD)      | 32.33% (16.43%)       | 29.97 (15.60)                  | <0.001         |



|                                                     |             |             |        |
|-----------------------------------------------------|-------------|-------------|--------|
| Census tract median income                          |             |             | <0.001 |
| <\$50,000, %                                        | 24.38       | 29.11       |        |
| \$50,000-\$74,999, %                                | 47.78       | 46.09       |        |
| \$75,000-\$99,999, %                                | 20.82       | 19.08       |        |
| ≥\$100,000, %                                       | 7.02        | 5.72        |        |
| Maternal depression, %                              | 9.64        | 11.50       | 0.003  |
| Maternal current smoking, %                         | 6.21        | 8.83        | <0.001 |
| Prior depressive symptoms, mean (SD)                | 1.20 (0.57) | 1.20 (0.60) | 0.65   |
| Prior overweight or obesity, %                      | 18.72       | 21.70       | <0.001 |
| Prior cigarette smoking, %                          | 16.70       | 18.42       | 0.02   |
| Prior drinking, %                                   | 8.25        | 8.31        | 0.92   |
| Prior marijuana use, %                              | 11.72       | 13.12       | 0.03   |
| Prior drug use other than marijuana, %              | 3.86        | 5.01        | 0.005  |
| Prior prescription drug misuse, %                   | 6.20        | 7.54        | 0.008  |
| Prior number of lifetime sexual partners, mean (SD) | 0.17 (0.70) | 0.24 (0.88) | <0.001 |
| Prior history of early sexual initiation, %         | 5.14        | 7.29        | <0.001 |
| Prior history of sexually transmitted infections, % | 0.16        | 0.36        | 0.05   |
| Prior history of teen pregnancy, %                  | 0.30        | 0.67        | 0.007  |

SES, socioeconomic status.

<sup>a</sup> ANOVA or chi-square tests were used to examine the mean levels (standard deviation, SD) of the characteristic or proportion of individuals within each follow-up category with that characteristic.

**Web Table 2A. Timing of assessment of all variables in this study (Growing Up Today Study, Nurses Health Study II)**

| <b>Growing Up Today Study (offspring assessment)</b>  |      |      |      |      |      |      |      |
|-------------------------------------------------------|------|------|------|------|------|------|------|
|                                                       | 1996 | 1998 | 1999 | 2005 | 2007 | 2010 | 2013 |
| <b>Exposures</b>                                      |      |      |      |      |      |      |      |
| Religious service attendance                          |      |      | √    |      |      |      |      |
| Prayer or meditation                                  |      |      | √    |      |      |      |      |
| <b>Outcomes</b>                                       |      |      |      |      |      |      |      |
| Life satisfaction                                     |      |      |      |      |      | √    |      |
| Positive affect                                       |      |      |      |      |      | √    |      |
| Self-esteem                                           |      |      |      |      |      | √    |      |
| Emotional processing                                  |      |      |      |      |      | √    |      |
| Emotional expression                                  |      |      |      |      |      | √    |      |
| Registered to vote                                    |      |      |      |      | √    |      |      |
| Frequency of volunteering                             |      |      |      |      | √    |      |      |
| Sense of mission                                      |      |      |      |      | √    |      |      |
| Forgiveness of others                                 |      |      |      |      | √    |      |      |
| Number of physical health problems                    |      |      |      |      |      | √    |      |
| Overweight/obesity                                    |      |      |      |      |      | √    |      |
| Depressive symptoms (past week)                       |      |      |      |      |      | √    |      |
| Anxiety symptoms (past week)                          |      |      |      |      |      | √    |      |
| Anxiety diagnosis (lifetime)                          |      |      |      |      |      |      | √    |
| Depression diagnosis (lifetime)                       |      |      |      |      |      |      | √    |
| Probable posttraumatic stress disorder (lifetime)     |      |      |      |      | √    |      |      |
| Cigarettes smoking (past year)                        |      |      |      |      |      | √    |      |
| Binge drinking (past year)                            |      |      |      |      |      | √    |      |
| Marijuana use (lifetime)                              |      |      |      |      |      | √    |      |
| Other illicit drug use (lifetime)                     |      |      |      |      |      | √    |      |
| Prescription drug misuse (lifetime)                   |      |      |      |      |      | √    |      |
| Number of lifetime sexual partners                    |      |      |      |      | √    |      |      |
| Early sexual initiation                               |      |      |      |      | √    |      |      |
| History of sexually transmitted infections (lifetime) |      |      |      |      |      |      | √    |
| Teen pregnancy                                        |      |      |      |      |      | √    |      |
| Abnormal Pap test                                     |      |      |      |      | √    |      |      |
| <b>Covariates</b>                                     |      |      |      |      |      |      |      |
| Age                                                   |      |      | √    |      |      |      |      |
| Sex                                                   | √    |      |      |      |      |      |      |
| Race                                                  | √    |      |      |      |      |      |      |
| Geographic region                                     | √    |      |      |      |      |      |      |
| Prior depressive symptoms                             |      |      | √    |      |      |      |      |
| Prior weight status                                   |      | √    |      |      |      |      |      |

|                                                                                          |  |   |   |   |   |  |  |
|------------------------------------------------------------------------------------------|--|---|---|---|---|--|--|
| Prior smoking                                                                            |  | √ |   |   |   |  |  |
| Prior drinking                                                                           |  | √ |   |   |   |  |  |
| Prior marijuana use                                                                      |  |   | √ |   |   |  |  |
| Prior drug use other than marijuana                                                      |  |   | √ |   |   |  |  |
| Prior prescription drug misuse                                                           |  |   | √ |   |   |  |  |
| Prior number of sexual partners                                                          |  |   | √ |   |   |  |  |
| Prior history of early sexual imitation                                                  |  |   | √ |   |   |  |  |
| Prior history of sexually transmitted infections                                         |  |   | √ |   |   |  |  |
| Prior history of teen pregnancy                                                          |  |   | √ |   |   |  |  |
| Adulthood religious service attendance<br>(used only in a sensitivity analysis)          |  |   |   | √ |   |  |  |
| Retrospectively reported childhood sexual abuse<br>(used only in a sensitivity analysis) |  |   |   |   | √ |  |  |

| <b>Nurses Health Study II (maternal assessment)</b> |      |      |      |      |
|-----------------------------------------------------|------|------|------|------|
|                                                     | 1989 | 1997 | 1999 | 2001 |
| Age                                                 |      |      | √    |      |
| Race                                                | √    |      |      |      |
| Marital status                                      |      | √    |      |      |
| Subjective socioeconomic status                     |      |      |      | √    |
| Household income                                    |      |      |      | √    |
| Census tract median income                          |      |      |      | √    |
| Census tract college education rate                 |      |      |      | √    |
| Maternal probable depression                        |      | √    |      |      |
| Maternal current smoking                            |      | √    |      |      |

**Web Table 2B. Sensitivity analysis adjusting for retrospectively reported childhood sexual abuse measured in 2007, not included in the main analyses because the covariate was measured concurrently with outcomes - Religious service attendance in adolescence and health and well-being in young adulthood <sup>a</sup> (Growing Up Today Study 1999 to 2007, 2010 or 2013 questionnaire wave, N ranged from 5,339 to 7,436 <sup>b</sup>)**

| Health and well-being outcomes     | Religious Service Attendance  |           |             |                      |                              |           |              |                      |
|------------------------------------|-------------------------------|-----------|-------------|----------------------|------------------------------|-----------|--------------|----------------------|
|                                    | Less than once/week vs. Never |           |             |                      | At least once/week vs. Never |           |              |                      |
|                                    | RR <sup>c</sup>               | $\beta^d$ | 95% CI      | P-value Threshold    | RR <sup>c</sup>              | $\beta^d$ | 95% CI       | P-value threshold    |
| <b>Psychological Well-being</b>    |                               |           |             |                      |                              |           |              |                      |
| Life satisfaction                  |                               | 0.02      | -0.06, 0.11 |                      |                              | 0.16      | 0.09, 0.24   | <0.0019 <sup>e</sup> |
| Positive affect                    |                               | 0.09      | 0.01, 0.17  | <0.05                |                              | 0.18      | 0.10, 0.25   | <0.0019 <sup>e</sup> |
| Self-esteem                        |                               | 0.02      | -0.06, 0.10 |                      |                              | 0.06      | -0.02, 0.13  |                      |
| Emotional processing               |                               | 0.04      | -0.05, 0.12 |                      |                              | 0.03      | -0.06, 0.11  |                      |
| Emotional expression               |                               | 0.03      | -0.06, 0.11 |                      |                              | 0.03      | -0.05, 0.11  |                      |
| <b>Character and Virtue</b>        |                               |           |             |                      |                              |           |              |                      |
| Frequency of volunteering          |                               | 0.13      | 0.06, 0.21  | <0.0019 <sup>e</sup> |                              | 0.28      | 0.21, 0.35   | <0.0019 <sup>e</sup> |
| Sense of mission                   |                               | 0.11      | 0.03, 0.19  | <0.01                |                              | 0.27      | 0.20, 0.35   | <0.0019 <sup>e</sup> |
| Forgiveness of others              |                               | 0.33      | 0.25, 0.42  | <0.0019 <sup>e</sup> |                              | 0.70      | 0.62, 0.78   | <0.0019 <sup>e</sup> |
| Registered to vote                 | 1.04                          |           | 1.01, 1.06  | <0.01                | 1.03                         |           | 1.01, 1.06   | <0.05                |
| <b>Physical Health</b>             |                               |           |             |                      |                              |           |              |                      |
| Number of physical health problems |                               | 0.09      | 0.01, 0.17  | <0.05                |                              | 0.00      | -0.07, 0.08  |                      |
| Overweight/obesity                 | 0.96                          |           | 0.87, 1.06  |                      | 1.00                         |           | 0.91, 1.09   |                      |
| <b>Mental Health</b>               |                               |           |             |                      |                              |           |              |                      |
| Depressive symptoms                |                               | -0.01     | -0.09, 0.08 |                      |                              | -0.11     | -0.19, -0.04 | <0.01                |
| Depression diagnosis               | 0.91                          |           | 0.77, 1.07  |                      | 0.87                         |           | 0.74, 1.03   |                      |
| Anxiety symptoms                   |                               | 0.03      | -0.05, 0.11 |                      |                              | -0.04     | -0.11, 0.04  |                      |
| Anxiety diagnosis                  | 1.00                          |           | 0.82, 1.22  |                      | 0.88                         |           | 0.73, 1.07   |                      |
| Probable PTSD                      | 0.87                          |           | 0.67, 1.14  |                      | 0.72                         |           | 0.56, 0.93   | <0.05                |
| <b>Health Behaviors</b>            |                               |           |             |                      |                              |           |              |                      |
| Cigarette smoking                  | 0.99                          |           | 0.88, 1.12  |                      | 0.86                         |           | 0.76, 0.97   | <0.01                |
| Frequent binge drinking            | 1.03                          |           | 0.92, 1.15  |                      | 0.94                         |           | 0.84, 1.05   |                      |
| Marijuana use                      | 0.99                          |           | 0.94, 1.05  |                      | 0.83                         |           | 0.78, 0.88   | <0.0019 <sup>e</sup> |

|                                    |      |       |             |  |      |       |              |                      |
|------------------------------------|------|-------|-------------|--|------|-------|--------------|----------------------|
| Any other illicit drug use         | 0.92 |       | 0.75, 1.14  |  | 0.63 |       | 0.52, 0.78   | <0.0019 <sup>e</sup> |
| Prescription drug misuse           | 1.03 |       | 0.90, 1.17  |  | 0.83 |       | 0.73, 0.95   | <0.01                |
| Number of lifetime sexual partners |      | -0.02 | -0.09, 0.05 |  |      | -0.27 | -0.33, -0.21 | <0.0019 <sup>e</sup> |
| Early sexual initiation            | 0.91 |       | 0.78, 1.06  |  | 0.66 |       | 0.56, 0.77   | <0.0019 <sup>e</sup> |
| History of STIs                    | 0.98 |       | 0.80, 1.20  |  | 0.79 |       | 0.65, 0.96   | <0.05                |
| Teen pregnancy                     | 0.88 |       | 0.50, 1.56  |  | 0.77 |       | 0.44, 1.34   |                      |
| Abnormal Pap test                  | 0.88 |       | 0.76, 1.02  |  | 0.83 |       | 0.71, 0.96   | <0.05                |

Abbreviations: RR, risk ratio; CI, confidence interval; PTSD, posttraumatic stress disorder; STIs, sexually transmitted infections.

<sup>a</sup> Participants' childhood sexual abuse was retrospectively reported at questionnaire wave 2007. Childhood sexual abuse was measured with two questions: "When you were a child (before age 11) were you touched in a sexual way by an adult or older child or were you forced to touch an adult or an older child in a sexual way when you did not want to" and "When you were a child (before age 11) did an adult or an older child force you or attempt to force you into any sexual activity by threatening you, holding you down or hurting you in some way when you did not want to". Response options included "no, this did not happen when I was a child", "Yes, this happened once" and "Yes, this happened more than once". Participants who reported "Yes, this happened once" or "Yes, this happened more than once" to at least one of the two questions were considered having experienced childhood sexual abuse (yes, no). The prevalence of childhood sexual abuse was 6.5% in this sample.

<sup>b</sup> The full analytic sample was restricted to those who had valid data on religious service attendance and childhood sexual abuse. The actual sample size for each analysis varies depending on the number of missing values on each outcome under investigation. Missing data on other covariates were imputed from previous questionnaire years; if no such data were available, missing were imputed with the mean values (continuous variables) or values of the largest category (categorical variables) of the non-missing data. All models controlled for participants' age, race, sex, geographic region, their mother's age, race, marital status, socioeconomic status (subjective socioeconomic status, household income, census tract college education rate, and census tract median income), maternal depression, maternal smoking, participants' prior health status or prior health behaviors (prior depressive symptoms, overweight/obesity, smoking, drinking, marijuana use, other drug use, prescription drug misuse, number of sexual partners, early sexual initiation, history of sexually transmitted infections, history of teen pregnancy), and participants' childhood sexual abuse.

<sup>c</sup> The effect estimates for the outcomes of probable PTSD, any other illicit drug use and teen pregnancy were odds ratio (these outcomes were rare [prevalence<10%], so the odds ratio would approximate RR). The effect estimates for other dichotomized outcomes were RR.

<sup>d</sup> All continuous outcomes were standardized (mean=0, standard deviation=1), and  $\beta$  was the standardized effect size.

<sup>e</sup>  $P < 0.05$  after Bonferroni correction (the p value cutoff for Bonferroni correction=0.05/26 outcomes=0.0019).

**Web Table 2C. Sensitivity analysis adjusting for retrospectively reported childhood sexual abuse measured in 2007, not included in the main analyses because the covariate was measured concurrently with outcomes - Prayer or meditation in adolescence and health and well-being in young adulthood, adjusting for childhood sexual abuse <sup>a</sup> (Growing Up Today Study 1999 to 2007, 2010 or 2013 questionnaire wave, N ranged from 5,335 to 7,426 <sup>b</sup>)**

| Health and well-being outcomes     | Prayer or meditation          |           |             |                      |                          |           |              |                      |                            |           |            |                   |                      |
|------------------------------------|-------------------------------|-----------|-------------|----------------------|--------------------------|-----------|--------------|----------------------|----------------------------|-----------|------------|-------------------|----------------------|
|                                    | Less than once/week vs. Never |           |             |                      | 1-6 times/week vs. Never |           |              |                      | Once/day or more vs. Never |           |            |                   |                      |
|                                    | RR <sup>c</sup>               | $\beta^d$ | 95% CI      | P-value threshold    | RR <sup>c</sup>          | $\beta^d$ | 95% CI       | P-value threshold    | RR <sup>c</sup>            | $\beta^d$ | 95% CI     | P-value threshold |                      |
| <b>Psychological Well-being</b>    |                               |           |             |                      |                          |           |              |                      |                            |           |            |                   |                      |
| Life satisfaction                  |                               | 0.06      | -0.03, 0.14 |                      |                          | 0.09      | 0.01, 0.17   | <0.05                |                            |           | 0.11       | 0.03, 0.19        | <0.05                |
| Positive affect                    |                               | 0.08      | -0.01, 0.16 |                      |                          | 0.12      | 0.04, 0.19   | <0.01                |                            |           | 0.15       | 0.07, 0.22        | <0.0019 <sup>e</sup> |
| Self-esteem                        |                               | 0.01      | -0.08, 0.09 |                      |                          | 0.10      | 0.02, 0.18   | <0.05                |                            |           | 0.07       | -0.01, 0.15       |                      |
| Emotional processing               |                               | 0.04      | -0.05, 0.13 |                      |                          | 0.10      | 0.02, 0.18   | <0.05                |                            |           | 0.15       | 0.07, 0.23        | <0.0019 <sup>e</sup> |
| Emotional expression               |                               | 0.08      | 0.00, 0.17  | <0.05                |                          | 0.13      | 0.05, 0.21   | <0.0019 <sup>e</sup> |                            |           | 0.14       | 0.06, 0.22        | <0.0019 <sup>e</sup> |
| <b>Character and Virtue</b>        |                               |           |             |                      |                          |           |              |                      |                            |           |            |                   |                      |
| Frequency of volunteering          |                               | 0.14      | 0.07, 0.22  | <0.0019 <sup>e</sup> |                          | 0.27      | 0.20, 0.34   | <0.0019 <sup>e</sup> |                            |           | 0.35       | 0.28, 0.42        | <0.0019 <sup>e</sup> |
| Sense of mission                   |                               | 0.14      | 0.06, 0.22  | <0.0019 <sup>e</sup> |                          | 0.21      | 0.14, 0.29   | <0.0019 <sup>e</sup> |                            |           | 0.44       | 0.36, 0.51        | <0.0019 <sup>e</sup> |
| Forgiveness of others              |                               | 0.38      | 0.29, 0.47  | <0.0019 <sup>e</sup> |                          | 0.61      | 0.53, 0.69   | <0.0019 <sup>e</sup> |                            |           | 0.84       | 0.76, 0.92        | <0.0019 <sup>e</sup> |
| Registered to vote                 | 1.01                          |           | 0.99, 1.04  |                      | 1.01                     |           | 0.98, 1.04   |                      | 1.03                       |           | 1.00, 1.05 | <0.05             |                      |
| <b>Physical Health</b>             |                               |           |             |                      |                          |           |              |                      |                            |           |            |                   |                      |
| Number of physical health problems |                               | 0.10      | 0.01, 0.19  | <0.05                |                          | 0.01      | -0.06, 0.09  |                      |                            |           | 0.07       | -0.01, 0.15       |                      |
| Overweight/obesity                 | 0.99                          |           | 0.89, 1.10  |                      | 0.98                     |           | 0.89, 1.09   |                      | 0.97                       |           | 0.88, 1.07 |                   |                      |
| <b>Mental Health</b>               |                               |           |             |                      |                          |           |              |                      |                            |           |            |                   |                      |
| Depressive symptoms                |                               | -0.08     | -0.17, 0.00 |                      |                          | -0.16     | -0.24, -0.08 | <0.0019 <sup>e</sup> |                            |           | -0.10      | -0.18, -0.02      | <0.05                |
| Depression diagnosis               | 0.91                          |           | 0.75, 1.09  |                      | 0.95                     |           | 0.80, 1.12   |                      | 0.89                       |           | 0.75, 1.05 |                   |                      |
| Anxiety symptoms                   |                               | 0.02      | -0.07, 0.10 |                      |                          | -0.01     | -0.09, 0.06  |                      |                            |           | 0.03       | -0.05, 0.11       |                      |
| Anxiety diagnosis                  | 1.00                          |           | 0.80, 1.24  |                      | 1.02                     |           | 0.83, 1.25   |                      | 0.97                       |           | 0.79, 1.19 |                   |                      |
| Probable PTSD                      | 0.71                          |           | 0.52, 0.96  | <0.05                | 0.93                     |           | 0.72, 1.22   |                      | 0.93                       |           | 0.72, 1.21 |                   |                      |
| <b>Health Behaviors</b>            |                               |           |             |                      |                          |           |              |                      |                            |           |            |                   |                      |
| Cigarette smoking                  | 0.99                          |           | 0.87, 1.13  |                      | 0.97                     |           | 0.86, 1.10   |                      | 0.87                       |           | 0.76, 0.99 | <0.05             |                      |

|                                    |       |             |       |       |              |                      |       |              |                      |
|------------------------------------|-------|-------------|-------|-------|--------------|----------------------|-------|--------------|----------------------|
| Frequent binge drinking            | 0.95  | 0.85, 1.07  |       | 0.98  | 0.89, 1.10   |                      | 0.87  | 0.78, 0.97   | <0.05                |
| Marijuana use                      | 0.98  | 0.93, 1.05  |       | 0.91  | 0.86, 0.97   | <0.01                | 0.74  | 0.69, 0.79   | <0.0019 <sup>e</sup> |
| Any other illicit drug use         | 0.90  | 0.72, 1.12  |       | 0.75  | 0.61, 0.92   | <0.01                | 0.54  | 0.44, 0.67   | <0.0019 <sup>e</sup> |
| Prescription drug misuse           | 0.90  | 0.79, 1.04  |       | 0.89  | 0.78, 1.01   |                      | 0.72  | 0.63, 0.82   | <0.0019 <sup>e</sup> |
| Number of lifetime sexual partners | -0.05 | -0.12, 0.03 |       | -0.13 | -0.20, -0.06 | <0.0019 <sup>e</sup> | -0.40 | -0.46, -0.33 | <0.0019 <sup>e</sup> |
| Early sexual initiation            | 1.06  | 0.90, 1.25  |       | 0.85  | 0.71, 1.01   |                      | 0.71  | 0.59, 0.85   | <0.0019 <sup>e</sup> |
| History of STIs                    | 0.91  | 0.74, 1.12  |       | 0.84  | 0.69, 1.02   |                      | 0.64  | 0.53, 0.79   | <0.0019 <sup>e</sup> |
| Teen pregnancy                     | 0.87  | 0.48, 1.57  |       | 0.59  | 0.31, 1.11   |                      | 0.84  | 0.48, 1.45   |                      |
| Abnormal Pap test                  | 0.82  | 0.70, 0.98  | <0.05 | 0.95  | 0.81, 1.11   |                      | 0.75  | 0.63, 0.88   | <0.0019 <sup>e</sup> |

Abbreviations: RR, risk ratio; CI, confidence interval; PTSD, posttraumatic stress disorder; STIs, sexually transmitted infections.

<sup>a</sup> Participants' childhood sexual abuse was retrospectively reported at questionnaire wave 2007. Childhood sexual abuse was measured with two questions: "When you were a child (before age 11) were you touched in a sexual way by an adult or older child or were you forced to touch an adult or an older child in a sexual way when you did not want to" and "When you were a child (before age 11) did an adult or an older child force you or attempt to force you into any sexual activity by threatening you, holding you down or hurting you in some way when you did not want to". Response options included "no, this did not happen when I was a child", "Yes, this happened once" and "Yes, this happened more than once". Participants who reported "Yes, this happened once" or "Yes, this happened more than once" to at least one of the two questions were considered having experienced childhood sexual abuse (yes, no). The prevalence of childhood sexual abuse was 6.5% in this sample.

<sup>b</sup> The full analytic sample was restricted to those who had valid data on prayer/meditation and childhood sexual abuse. The actual sample size for each analysis varies depending on the number of missing values on each outcome under investigation. Missing data on other covariates were imputed from previous questionnaire years; if no such data were available, missing were imputed with the mean values (continuous variables) or values of the largest category (categorical variables) of the non-missing data. All models controlled for participants' age, race, sex, geographic region, their mother's age, race, marital status, socioeconomic status (subjective socioeconomic status, household income, census tract college education rate, and census tract median income), maternal depression, maternal smoking, participants' prior health status or prior health behaviors (prior depressive symptoms, overweight/obesity, smoking, drinking, marijuana use, other drug use, prescription drug misuse, number of sexual partners, early sexual initiation, history of sexually transmitted infections, history of teen pregnancy), and participants' childhood sexual abuse.

<sup>c</sup> The effect estimates for the outcomes of probable PTSD, any other illicit drug use and teen pregnancy were odds ratio (these outcomes were rare [prevalence<10%], so the odds ratio would approximate RR). The effect estimates for other dichotomized outcomes were RR.

<sup>d</sup> All continuous outcomes were standardized (mean=0, standard deviation=1), and  $\beta$  was the standardized effect size.

<sup>e</sup>  $P < 0.05$  after Bonferroni correction (the p value cutoff for Bonferroni correction=0.05/26 outcomes=0.0019).

**Web Table 3. Assessment of all outcome variables in this study (Growing Up Today Study)**

| <b>Outcome variable</b>   | <b>Questionnaire wave (GUTS)</b> | <b>Measurement</b>                                                                                                                                            | <b>Response range or categories</b>                |
|---------------------------|----------------------------------|---------------------------------------------------------------------------------------------------------------------------------------------------------------|----------------------------------------------------|
| Life satisfaction         | 2010                             | One item from the Rand Mental Health Inventory “Have you felt happy, satisfied or please with your personal life”                                             | Range: 1 (none of the time) to 6 (all of the time) |
| Positive affect           | 2010                             | Ten items from the Rand Mental Health Inventory                                                                                                               | Range: 10 to 60                                    |
| Self-esteem               | 2010                             | Rosenberg Self-esteem Scale                                                                                                                                   | Range: 10 to 60                                    |
| Emotional processing      | 2010                             | Emotional processing subscale from the Emotional Approach Coping Scale                                                                                        | Range: 4 to 16                                     |
| Emotional expression      | 2010                             | Emotional expression subscale from the Emotional Approach Coping Scale                                                                                        | Range: 4 to 16                                     |
| Frequency of volunteering | 2010                             | One item “In an average month, how many hours do you spend on volunteer work, community service, or helping people outside of your home without getting paid” | Range: 1 (0 hour) to 4 (10 or more hours)          |
| Sense of mission          | 2007                             | One item “I have a sense of mission or calling in my own life”                                                                                                | Range: 1 (strongly agree) to 4 (strongly disagree) |
| Forgiveness of others     | 2007                             | One item “Because of my spiritual or religious beliefs, I have forgiven those who hurt me”                                                                    | Range: 1 (always or almost always) to 4 (never)    |
| Registered to vote        | 2007                             | One item: ”Are you currently registered to vote”                                                                                                              | Yes, no                                            |



---

|                                        |      |                                                                                                                                                                                                                                                                                             |                  |
|----------------------------------------|------|---------------------------------------------------------------------------------------------------------------------------------------------------------------------------------------------------------------------------------------------------------------------------------------------|------------------|
| Number of physical health problems     | 2010 | Total number of the following conditions reported: had ever been told by a health care provider that they had cancer, diabetes, high cholesterol, high blood pressure or asthma                                                                                                             | Ranged: 0 to 4   |
| Overweight/obesity                     | 2010 | BMI $\geq$ 25 as kg/m <sup>2</sup> as overweight or obese                                                                                                                                                                                                                                   | Yes, no          |
| Depressive symptoms                    | 2010 | Center for Epidemiologic Studies Depression Scale                                                                                                                                                                                                                                           | Ranged: 10 to 30 |
| Depression diagnosis                   | 2013 | Ever been told by a healthcare provider that they had depression                                                                                                                                                                                                                            | Yes, no          |
| Anxiety symptoms                       | 2010 | 9 items from the Worry/Sensitivity Subscale of the Revised Children's Manifest Anxiety Scale                                                                                                                                                                                                | 9 to 54          |
| Anxiety diagnosis                      | 2013 | Ever been told by a healthcare provider they had anxiety                                                                                                                                                                                                                                    | Yes, no          |
| Probable posttraumatic stress disorder | 2007 | A 7-item short screening scale, with 6 or more symptoms as the cutoff to define probable PTSD                                                                                                                                                                                               | Yes, no          |
| Cigarettes smoking                     | 2010 | One item: "In the past 12 months, have you smoked a cigarette"                                                                                                                                                                                                                              | Yes, no          |
| Frequent binge drinking                | 2010 | One item: "In the past 12 months, how many times did you drink 5 (for male)/4(for female) or more alcoholic drinks over a few hours", with at least 12 episodes of binge drinking as the cutoff to define frequent binge drinking                                                           | Yes, no          |
| Marijuana use                          | 2010 | One item: "Have you ever used marijuana".                                                                                                                                                                                                                                                   | Yes, no          |
| Other illicit drug use                 | 2010 | Participants were asked to report whether they ever used the following drugs: cocaine or crack, heroin, ecstasy, LSD/mushrooms or any other hallucinogen, crystal meth, or other amphetamines. Those who reported use of any of the drugs were considered as having other illicit drug use. | Yes, no          |

---

---

|                                            |      |                                                                                                                                                                                                                                                                                                            |                                              |
|--------------------------------------------|------|------------------------------------------------------------------------------------------------------------------------------------------------------------------------------------------------------------------------------------------------------------------------------------------------------------|----------------------------------------------|
| Non-medical prescription drug use          | 2010 | Participants were asked to report whether they ever used the following drugs without a doctor's prescription: tranquilizers, pain killers, sleeping pills and stimulants. Those who reported use of any of the drugs were considered as having non-medical prescription drug use.                          | Yes, no                                      |
| Number of lifetime sexual partners         | 2007 | Participants were asked to report whether they ever had sexual intercourse (yes, no, not sure). Those who answered "yes" or "not sure" were further asked to report the number of their lifetime sexual partners: "During your life, with how many people have you had sexual intercourse".                | Range: 0 (0 person) to 8 (21 or more people) |
| Early sexual initiation                    | 2007 | Age of sexual initiation was assessed with one item "How old were you when you had sexual intercourse for the first time". Age 15 years or younger was considered as early initiation                                                                                                                      | Yes, no                                      |
| History of sexually transmitted infections | 2013 | Participants reported whether they had been told by a health care provider that they had chlamydia, HPV, genital warts or any STIs. Those who reported any of the conditions were considered as having STIs diagnosis                                                                                      | Yes, no                                      |
| Teen pregnancy                             | 2010 | Participants who were ever pregnant (for female) or ever impregnated a woman (for male) reported the calendar year in which their/their partner's first pregnancy ended. The age of first pregnancy was calculated by subtracting their/their partner's birth year from the year of their first pregnancy. | Yes, no                                      |

---

---

|                   |      |                                                                                                                                                                                                                                                                                                                                                                                                                                                     |         |
|-------------------|------|-----------------------------------------------------------------------------------------------------------------------------------------------------------------------------------------------------------------------------------------------------------------------------------------------------------------------------------------------------------------------------------------------------------------------------------------------------|---------|
| Abnormal Pap test | 2007 | Pregnancy before age 20 was considered as teen pregnancy.                                                                                                                                                                                                                                                                                                                                                                                           | Yes, no |
|                   |      | <p>Participants reported whether they ever had a Pap test (no, yes, not sure). Those who reported “yes” or “not sure” were prompted to respond to a second question “Have you been told by a doctor or other health care provider that you had an abnormal Pap test” (yes, no, not sure). Those who reported “yes” were considered as having abnormal Pap test, whereas those who reported “no” were considered as not having abnormal Pap test</p> |         |

---

GUTS, the Growing Up Today Study.

**Web Table 4. Distribution of participant characteristics in the full analytic sample for analyses on religious service attendance (Growing Up Today Study, N=10,813)**

|                                                                             | Questionnaire wave<br>(GUTS) | Mean (SD) or %  |
|-----------------------------------------------------------------------------|------------------------------|-----------------|
| <b>Sociodemographic factors (covariates)</b>                                |                              |                 |
| Age, in years (range: 12-19)                                                | 1999                         | 14.74 (1.66)    |
| Boy, %                                                                      | 1999                         | 41.12           |
| White, %                                                                    | 1999                         | 93.33           |
| Geographic region                                                           | 1999                         |                 |
| West, %                                                                     |                              | 15.03           |
| Midwest, %                                                                  |                              | 35.54           |
| South, %                                                                    |                              | 14.44           |
| Northeast, %                                                                |                              | 35.00           |
| Mother's age, in years (range: 35-54)                                       | 1999                         | 44.13 (3.57)    |
| Mother's race (White), %                                                    | 1999                         | 97.30           |
| Mother's marital status (married), %                                        | 1997                         | 92.23           |
| Mother's subjective socioeconomic status in the US,<br>(range: 1-10)        | 2001                         | 7.14 (1.30)     |
| Mother's subjective socioeconomic status in the community,<br>(range: 1-10) | 2001                         | 7.02 (1.55)     |
| Pretax household income                                                     | 2001                         |                 |
| <\$50,000, %                                                                |                              | 13.08           |
| \$50,000-\$74,999, %                                                        |                              | 23.82           |
| \$75,000-\$99,999, %                                                        |                              | 22.54           |
| ≥\$100,000, %                                                               |                              | 40.57           |
| Census tract college education rate, (range: 0%-85%)                        | 2001                         | 31.49% (16.18%) |
| Census tract median income                                                  | 2001                         |                 |
| <\$50,000, %                                                                |                              | 26.07           |
| \$50,000-\$74,999, %                                                        |                              | 47.18           |
| \$75,000-\$99,999, %                                                        |                              | 20.19           |
| ≥\$100,000, %                                                               |                              | 6.56            |
| <b>Religious service attendance (exposure)</b>                              | 1999                         |                 |

|                                                                                 |      |              |
|---------------------------------------------------------------------------------|------|--------------|
| Never, %                                                                        |      | 15.05        |
| Less than once/week, %                                                          |      | 27.18        |
| At least once/week, %                                                           |      | 57.77        |
| <b>Psychological well-being (outcomes)</b>                                      |      |              |
| Life satisfaction, (range: 1-6)                                                 | 2010 | 4.44 (1.02)  |
| Positive affect, (range: 10-60)                                                 | 2010 | 39.99 (8.74) |
| Self-esteem, (range: 10-40)                                                     | 2010 | 33.71 (4.97) |
| Emotional processing, (range: 4-16)                                             | 2010 | 11.22 (2.76) |
| Emotional expression, (range: 4-16)                                             | 2010 | 10.64 (3.02) |
| <b>Character and virtue (outcomes)</b>                                          |      |              |
| Frequency of volunteering, (range: 1: 0 hour/month - 4: 10 or more hours/month) | 2007 | 1.83 (0.87)  |
| Sense of mission, (range: 1-4)                                                  | 2007 | 3.06 (0.73)  |
| Forgiveness of others, (range: 1-4)                                             | 2007 | 2.93 (0.86)  |
| Registered to vote, %                                                           | 2007 | 89.68        |
| <b>Physical health (outcomes)</b>                                               |      |              |
| Number of physical health problems, (range: 0-4)                                | 2010 | 0.36 (0.59)  |
| Overweight/obesity, %                                                           | 2010 | 36.67        |
| <b>Mental health (outcomes)</b>                                                 |      |              |
| Depressive symptoms over the past week, (range: 0-30)                           | 2010 | 7.25 (4.63)  |
| History of depression diagnosis, %                                              | 2013 | 17.45        |
| Anxiety symptoms over the past week, (range: 9-54)                              | 2010 | 22.30 (8.36) |
| History of anxiety diagnosis, %                                                 | 2013 | 14.16        |
| Probable posttraumatic stress disorder, %                                       | 2007 | 7.70         |
| <b>Health behaviors (outcomes)</b>                                              |      |              |
| Ever cigarette smoking over the past 12 months, %                               | 2010 | 24.62        |
| Frequent binge drinking over the past 12 months, %                              | 2010 | 30.56        |
| Marijuana use (lifetime), %                                                     | 2010 | 54.49        |
| Other illegal drug use (lifetime), %                                            | 2010 | 22.15        |
| Prescription drug misuse (lifetime), %                                          | 2010 | 23.27        |

|                                                                 |      |             |
|-----------------------------------------------------------------|------|-------------|
| Number of lifetime sexual partners, (range: 0-8)                | 2007 | 3.11 (2.58) |
| Early sexual initiation, %                                      | 2007 | 10.73       |
| History of sexually transmitted infections, %                   | 2013 | 12.80       |
| Teen pregnancy, %                                               | 2010 | 2.14        |
| Lifetime history of abnormal Pap test (among females), %        | 2007 | 24.78       |
| <b>Maternal health (covariates)</b>                             |      |             |
| Maternal probable depression over the past 4 weeks, %           | 1997 | 10.31       |
| Maternal current smoking, %                                     | 1997 | 7.14        |
| <b>Prior health status or health behaviors (covariates)</b>     |      |             |
| Prior depressive symptoms over the past year, (range: 0-4)      | 1999 | 1.20 (0.58) |
| Prior overweight or obesity, %                                  | 1998 | 19.76       |
| Prior cigarette smoking (past 12 months), %                     | 1999 | 17.30       |
| Prior drinking (past 12 months), %                              | 1998 | 8.27        |
| Prior marijuana use (lifetime), %                               | 1999 | 12.20       |
| Prior drug use other than marijuana (lifetime), %               | 1999 | 4.27        |
| Prior prescription drug misuse (lifetime), %                    | 1999 | 6.68        |
| Prior number of lifetime sexual partners, (range: 0-6)          | 1999 | 0.19 (0.77) |
| Prior history of early sexual initiation, %                     | 1999 | 5.89        |
| Prior history of sexually transmitted infections, %             | 1999 | 0.23        |
| Prior history of teen pregnancy, %                              | 1999 | 0.43        |
| Childhood sexual abuse (covariate, for sensitivity analysis), % | 2007 | 6.50        |

---

**Web Table 5. Distribution of participant characteristics in the full analytic sample for analyses on prayer or meditation (Growing Up Today Study, N=10,789)**

|                                                                             | Questionnaire wave<br>(GUTS) | Mean (SD) or %  |
|-----------------------------------------------------------------------------|------------------------------|-----------------|
| <b>Sociodemographic factors (covariates)</b>                                |                              |                 |
| Age, in years (range: 12-19)                                                | 1999                         | 14.74 (1.66)    |
| Boy, %                                                                      | 1999                         | 41.09           |
| White, %                                                                    | 1999                         | 93.33           |
| Geographic region                                                           | 1999                         |                 |
| West, %                                                                     |                              | 15.03           |
| Midwest, %                                                                  |                              | 35.51           |
| South, %                                                                    |                              | 14.46           |
| Northeast, %                                                                |                              | 35.00           |
| Mother's age, in years (range: 35-54)                                       | 1999                         | 44.13 (3.56)    |
| Mother's race (White), %                                                    | 1999                         | 97.29           |
| Mother's marital status (married), %                                        | 1997                         | 92.25           |
| Mother's subjective socioeconomic status in the US,<br>(range: 1-10)        | 2001                         | 7.14 (1.30)     |
| Mother's subjective socioeconomic status in the community,<br>(range: 1-10) | 2001                         | 7.02 (1.55)     |
| Pretax household income                                                     | 2001                         |                 |
| <\$50,000, %                                                                |                              | 13.10           |
| \$50,000-\$74,999, %                                                        |                              | 23.80           |
| \$75,000-\$99,999, %                                                        |                              | 22.61           |
| ≥\$100,000, %                                                               |                              | 40.49           |
| Census tract college education rate, (range: 0%-85%)                        | 2001                         | 31.50% (16.19%) |
| Census tract median income                                                  | 2001                         |                 |
| <\$50,000, %                                                                |                              | 26.07           |
| \$50,000-\$74,999, %                                                        |                              | 47.15           |
| \$75,000-\$99,999, %                                                        |                              | 20.21           |
| ≥\$100,000, %                                                               |                              | 6.57            |
| <b>Frequency of prayer or meditation (exposure)</b>                         | 1999                         |                 |

|                                                                                 |      |              |
|---------------------------------------------------------------------------------|------|--------------|
| Never, %                                                                        |      | 17.91        |
| Less than once/week, %                                                          |      | 18.28        |
| 1-6 times/week, %                                                               |      | 27.78        |
| At least once/day, %                                                            |      | 36.04        |
| <b>Psychological well-being (outcomes)</b>                                      |      |              |
| Life satisfaction, (range: 1-6)                                                 | 2010 | 4.43 (1.02)  |
| Positive affect, (range: 10-60)                                                 | 2010 | 39.97 (8.74) |
| Self-esteem, (range: 10-40)                                                     | 2010 | 33.70 (4.97) |
| Emotional processing, (range: 4-16)                                             | 2010 | 11.22 (2.76) |
| Emotional expression, (range: 4-16)                                             | 2010 | 10.63 (3.02) |
| <b>Character and virtue (outcomes)</b>                                          |      |              |
| Frequency of volunteering, (range: 1: 0 hour/month - 4: 10 or more hours/month) | 2007 | 1.83 (0.87)  |
| Sense of mission, (range: 1-4)                                                  | 2007 | 3.06 (0.73)  |
| Forgiveness of others, (range: 1-4)                                             | 2007 | 2.94 (0.86)  |
| Registered to vote, %                                                           | 2007 | 89.66        |
| <b>Physical health (outcomes)</b>                                               |      |              |
| Number of physical health problems, (range: 0-4)                                | 2010 | 0.36 (0.59)  |
| Overweight/obesity, %                                                           | 2010 | 36.61        |
| <b>Mental health (outcomes)</b>                                                 |      |              |
| Depressive symptoms over the past week, (range: 0-30)                           | 2010 | 7.25 (4.63)  |
| History of depression diagnosis, %                                              | 2013 | 17.42        |
| Anxiety symptoms over the past week, (range: 9-54)                              | 2010 | 22.31 (8.36) |
| History of anxiety diagnosis, %                                                 | 2013 | 14.16        |
| Probable posttraumatic stress disorder, %                                       | 2007 | 7.70         |
| <b>Health behaviors (outcomes)</b>                                              |      |              |
| Ever cigarette smoking over the past 12 months, %                               | 2010 | 24.65        |
| Frequent binge drinking over the past 12 months, %                              | 2010 | 30.58        |
| Marijuana use (lifetime), %                                                     | 2010 | 54.53        |
| Other illegal drug use (lifetime), %                                            | 2010 | 22.19        |



|                                                                                     |      |             |
|-------------------------------------------------------------------------------------|------|-------------|
| Prescription drug misuse (lifetime), %                                              | 2010 | 23.32       |
| Number of lifetime sexual partners, (range: 0-8)                                    | 2007 | 3.11 (2.59) |
| Early sexual initiation, %                                                          | 2007 | 10.76       |
| History of sexually transmitted infections, %                                       | 2013 | 12.78       |
| Teen pregnancy, %                                                                   | 2010 | 2.14        |
| Lifetime history of abnormal Pap test (among females), %                            | 2007 | 24.84       |
| <b>Maternal health (covariates)</b>                                                 |      |             |
| Maternal probable depression over the past 4 weeks, %                               | 1997 | 10.27       |
| Maternal current smoking, %                                                         | 1997 | 7.14        |
| <b>Prior health status or health behaviors (covariates)</b>                         |      |             |
| Prior depressive symptoms over the past year, (range: 0-4)                          | 1999 | 1.20 (0.58) |
| Prior overweight or obesity , %                                                     | 1998 | 19.78       |
| Prior cigarette smoking (past 12 months), %                                         | 1999 | 17.34       |
| Prior drinking (past 12 months), %                                                  | 1998 | 8.29        |
| Prior marijuana use (lifetime), %                                                   | 1999 | 12.26       |
| Prior drug use other than marijuana (lifetime), %                                   | 1999 | 4.28        |
| Prior prescription drug misuse (lifetime), %                                        | 1999 | 6.68        |
| Prior number of lifetime sexual partners, (range: 0-6)                              | 1999 | 0.19 (0.77) |
| Prior history of early sexual initiation, %                                         | 1999 | 5.92        |
| Prior history of sexually transmitted infections, %                                 | 1999 | 0.23        |
| Prior history of teen pregnancy, %                                                  | 1999 | 0.43        |
| Childhood sexual abuse (covariate, for sensitivity analysis), %                     | 2007 | 6.49        |
| <b>Adulthood religious service attendance (covariate, for sensitivity analysis)</b> |      |             |
| Never, %                                                                            | 2005 | 39.86       |
| Less than once/week, %                                                              |      | 35.61       |
| At least once/week, %                                                               |      | 24.52       |

---

**Web Table 6. Distribution of participant characteristics by frequency of prayer or meditation at study baseline (Growing Up Today Study 1999 questionnaire wave, N=10,789)**

|                                                                   | Prayer or meditation <sup>a</sup> |                          |                                |                                   | <i>P</i> |
|-------------------------------------------------------------------|-----------------------------------|--------------------------|--------------------------------|-----------------------------------|----------|
|                                                                   | Never<br>(n=1,932)                | < Once/week<br>(n=1,972) | 1-6<br>times/week<br>(n=2,997) | At least<br>once/day<br>(n=3,888) |          |
| <b><i>Sociodemographic factors</i></b>                            |                                   |                          |                                |                                   |          |
| Age (range: 12-19), mean (SD)                                     | 14.93 (1.67)                      | 14.87 (1.68)             | 14.70 (1.67)                   | 14.61 (1.64)                      | <0.001   |
| Boy, %                                                            | 52.74                             | 39.40                    | 40.84                          | 36.34                             | <0.001   |
| White, %                                                          | 91.90                             | 93.49                    | 93.78                          | 93.60                             | 0.05     |
| Geographic region                                                 |                                   |                          |                                |                                   | <0.001   |
| West, %                                                           | 23.86                             | 13.10                    | 12.22                          | 13.80                             |          |
| Midwest, %                                                        | 27.07                             | 34.31                    | 37.66                          | 38.65                             |          |
| South, %                                                          | 8.71                              | 11.88                    | 15.33                          | 17.95                             |          |
| Northeast, %                                                      | 40.35                             | 40.71                    | 34.79                          | 29.61                             |          |
| Mother's age (range: 35-54), mean (SD)                            | 44.93 (3.59)                      | 44.36 (3.50)             | 43.93 (3.51)                   | 43.78 (3.55)                      | <0.001   |
| Mother's race (white), %                                          | 96.32                             | 97.31                    | 97.59                          | 97.53                             | 0.03     |
| Mother married, %                                                 | 88.98                             | 90.62                    | 92.59                          | 94.44                             | <0.001   |
| Mother's subjective SES in the US (range: 1-10), mean (SD)        | 7.21 (1.33)                       | 7.09 (1.31)              | 7.11 (1.27)                    | 7.15 (1.30)                       | 0.02     |
| Mother's subjective SES in the community (range: 1-10), mean (SD) | 6.97 (1.61)                       | 6.91 (1.59)              | 7.01 (1.52)                    | 7.10 (1.52)                       | <0.001   |
| Pretax household income                                           |                                   |                          |                                |                                   | <0.001   |
| <\$50,000, %                                                      | 11.45                             | 12.92                    | 12.99                          | 14.16                             |          |
| \$50,000-\$74,999, %                                              | 22.28                             | 22.26                    | 24.93                          | 24.51                             |          |
| \$75,000-\$99,999, %                                              | 20.43                             | 23.80                    | 22.94                          | 22.86                             |          |
| ≥\$100,000, %                                                     | 45.85                             | 41.02                    | 39.14                          | 38.47                             |          |
| Census tract college education rate (range: 0%-85%), mean (SD)    | 35.06%<br>(17.08%)                | 32.55%<br>(16.54%)       | 31.06%<br>(15.96%)             | 29.54%<br>(15.38%)                | <0.001   |

|                                                                  |             |             |             |             |        |
|------------------------------------------------------------------|-------------|-------------|-------------|-------------|--------|
| Census tract median income                                       |             |             |             |             | <0.001 |
| <\$50,000, %                                                     | 20.04       | 23.99       | 27.63       | 28.91       |        |
| \$50,000-\$74,999, %                                             | 45.47       | 45.59       | 47.35       | 48.64       |        |
| \$75,000-\$99,999, %                                             | 24.03       | 22.62       | 20.02       | 17.23       |        |
| ≥\$100,000, %                                                    | 10.46       | 7.81        | 5.01        | 5.22        |        |
| <b>Maternal health</b>                                           |             |             |             |             |        |
| Maternal probable depression, %                                  | 11.46       | 12.12       | 10.50       | 8.57        | <0.001 |
| Maternal current smoking, %                                      | 8.17        | 8.57        | 6.98        | 6.02        | 0.001  |
| <b>Prior health behaviors</b>                                    |             |             |             |             |        |
| Prior depressive symptoms (range: 0-4), mean (SD)                | 1.22 (0.61) | 1.27 (0.61) | 1.22 (0.57) | 1.15 (0.55) | <0.001 |
| Prior overweight or obesity, %                                   | 20.53       | 21.06       | 20.92       | 17.88       | 0.004  |
| Prior cigarette smoking, %                                       | 23.42       | 22.47       | 16.77       | 12.14       | <0.001 |
| Prior drinking, %                                                | 12.56       | 10.95       | 8.13        | 5.00        | <0.001 |
| Prior marijuana use, %                                           | 20.67       | 16.32       | 11.01       | 7.03        | <0.001 |
| Prior drug use other than marijuana, %                           | 7.46        | 5.04        | 3.99        | 2.53        | <0.001 |
| Prior prescription drug misuse, %                                | 8.47        | 7.90        | 6.68        | 5.17        | <0.001 |
| Prior number of lifetime sexual partners (range: 0-6), mean (SD) | 0.32 (0.97) | 0.26 (0.86) | 0.18 (0.74) | 0.11 (0.59) | <0.001 |
| Prior history of early sexual initiation, %                      | 10.72       | 7.62        | 4.95        | 3.43        | <0.001 |
| Prior history of sexually transmitted infections, %              | 0.49        | 0.48        | 0.14        | 0.05        | 0.001  |
| Prior history of teen pregnancy, %                               | 0.77        | 0.43        | 0.35        | 0.32        | 0.10   |

SES, socioeconomic status.

<sup>a</sup> ANOVA or chi-square tests were used to examine the mean levels (standard deviation, SD) of the characteristic or proportion of individuals within each prayer or meditation category with that characteristic.

**Web Table 7. Religious service attendance, prayer or meditation in adolescence and health and well-being in young adulthood (Growing Up Today Study 1999 to 2007, 2010 or 2013 questionnaire wave, N ranged from 5,669 to 7,431<sup>a</sup>)**

|                                    | Religious Service Attendance |                                                 |                                                       | Prayer or Meditation                            |                                                        |                                                          |
|------------------------------------|------------------------------|-------------------------------------------------|-------------------------------------------------------|-------------------------------------------------|--------------------------------------------------------|----------------------------------------------------------|
|                                    | Never<br>(Ref)               | <1/week<br>OR/RR/ $\beta$ (95% CI) <sup>b</sup> | $\geq$ 1/week<br>OR/RR/ $\beta$ (95% CI) <sup>b</sup> | <1/week<br>OR/RR/ $\beta$ (95% CI) <sup>b</sup> | 1-6 times/week<br>OR/RR/ $\beta$ (95% CI) <sup>b</sup> | Once/day or more<br>OR/RR/ $\beta$ (95% CI) <sup>b</sup> |
| <b>Psychological Well-being</b>    |                              |                                                 |                                                       |                                                 |                                                        |                                                          |
| Life satisfaction                  | 0.00                         | 0.02 (-0.07, 0.11)                              | 0.10 (0.01, 0.19)*                                    | 0.02 (-0.07, 0.11)                              | 0.05 (-0.04, 0.14)                                     | 0.07 (-0.02, 0.16)                                       |
| Positive affect                    | 0.00                         | 0.07 (-0.01, 0.16)                              | 0.14 (0.05, 0.23)**                                   | 0.03 (-0.06, 0.11)                              | 0.04 (-0.04, 0.13)                                     | 0.08 (0.00, 0.17)                                        |
| Self-esteem                        | 0.00                         | 0.03 (-0.06, 0.11)                              | 0.03 (-0.06, 0.11)                                    | 0.00 (-0.08, 0.09)                              | 0.09 (0.00, 0.18)*                                     | 0.07 (-0.02, 0.16)                                       |
| Emotional processing               | 0.00                         | -0.02 (-0.11, 0.07)                             | -0.08 (-0.17, 0.01)                                   | 0.04 (-0.05, 0.13)                              | 0.13 (0.03, 0.22)**                                    | 0.16 (0.07, 0.26)***                                     |
| Emotional expression               | 0.00                         | -0.02 (-0.11, 0.07)                             | -0.05 (-0.14, 0.03)                                   | 0.10 (0.01, 0.19)*                              | 0.16 (0.07, 0.25)***                                   | 0.18 (0.09, 0.27)***                                     |
| <b>Character and virtue</b>        |                              |                                                 |                                                       |                                                 |                                                        |                                                          |
| Frequency of volunteering          | 0.00                         | 0.05 (-0.03, 0.13)                              | 0.13 (0.05, 0.21)***                                  | 0.11 (0.03, 0.19)*                              | 0.21 (0.13, 0.29)***                                   | 0.28 (0.20, 0.36)***                                     |
| Sense of mission                   | 0.00                         | 0.02 (-0.06, 0.11)                              | 0.10 (0.02, 0.19)*                                    | 0.11 (0.03, 0.20)*                              | 0.16 (0.08, 0.25)***                                   | 0.38 (0.30, 0.47)***                                     |
| Forgiveness of others              | 0.00                         | 0.14 (0.04, 0.23)**                             | 0.38 (0.28, 0.47)***                                  | 0.28 (0.18, 0.38)***                            | 0.43 (0.33, 0.53)***                                   | 0.63 (0.54, 0.73)***                                     |
| Registered to vote                 | 1.00                         | 1.04 (1.01, 1.07)*                              | 1.03 (1.00, 1.06)                                     | 1.00 (0.97, 1.03)                               | 1.00 (0.97, 1.03)                                      | 1.02 (0.99, 1.04)                                        |
| <b>Physical health</b>             |                              |                                                 |                                                       |                                                 |                                                        |                                                          |
| Number of physical health problems | 0.00                         | 0.06 (-0.02, 0.15)                              | -0.04 (-0.12, 0.05)                                   | 0.08 (-0.01, 0.17)                              | 0.03 (-0.05, 0.11)                                     | 0.09 (0.01, 0.18)*                                       |
| Overweight/obesity                 | 1.00                         | 0.99 (0.89, 1.11)                               | 1.04 (0.93, 1.16)                                     | 1.03 (0.92, 1.15)                               | 0.99 (0.89, 1.11)                                      | 1.00 (0.89, 1.12)                                        |
| <b>Mental health</b>               |                              |                                                 |                                                       |                                                 |                                                        |                                                          |
| Depressive symptoms                | 0.00                         | -0.00 (-0.09, 0.09)                             | -0.09 (-0.18, -0.00)*                                 | -0.06 (-0.14, 0.03)                             | -0.10 (-0.19, -0.02)*                                  | -0.03 (-0.12, 0.05)                                      |
| Depression diagnosis               | 1.00                         | 0.91 (0.76, 1.09)                               | 0.89 (0.74, 1.07)                                     | 0.97 (0.80, 1.17)                               | 1.01 (0.83, 1.22)                                      | 0.93 (0.77, 1.13)                                        |
| Anxiety symptoms                   | 0.00                         | 0.00 (-0.08, 0.09)                              | -0.08 (-0.17, 0.01)                                   | 0.03 (-0.06, 0.12)                              | 0.03 (-0.06, 0.12)                                     | 0.08 (-0.01, 0.16)                                       |
| Anxiety diagnosis                  | 1.00                         | 1.00 (0.81, 1.24)                               | 0.88 (0.70, 1.10)                                     | 1.02 (0.82, 1.27)                               | 1.06 (0.84, 1.33)                                      | 1.02 (0.81, 1.29)                                        |
| Probable PTSD                      | 1.00                         | 0.86 (0.64, 1.16)                               | 0.65 (0.48, 0.88)**                                   | 0.81 (0.58, 1.13)                               | 1.16 (0.85, 1.58)                                      | 1.21 (0.89, 1.65)                                        |
| <b>Health Behaviors</b>            |                              |                                                 |                                                       |                                                 |                                                        |                                                          |
| Cigarette smoking                  | 1.00                         | 0.97 (0.86, 1.10)                               | 0.84 (0.73, 0.96)*                                    | 1.01 (0.88, 1.15)                               | 1.07 (0.93, 1.22)                                      | 0.96 (0.84, 1.11)                                        |

|                                    |      |                    |                         |                     |                     |                         |
|------------------------------------|------|--------------------|-------------------------|---------------------|---------------------|-------------------------|
| Frequent binge drinking            | 1.00 | 1.07 (0.95, 1.20)  | 1.00 (0.88, 1.13)       | 0.96 (0.85, 1.08)   | 0.99 (0.88, 1.12)   | 0.90 (0.80, 1.02)       |
| Marijuana use                      | 1.00 | 1.01 (0.95, 1.07)  | 0.90 (0.84, 0.96)***    | 1.00 (0.94, 1.06)   | 0.95 (0.89, 1.02)   | 0.79 (0.74, 0.85)***    |
| Any other illicit drug use         | 1.00 | 0.99 (0.80, 1.24)  | 0.79 (0.63, 0.99)*      | 0.93 (0.74, 1.16)   | 0.81 (0.64, 1.02)   | 0.62 (0.49, 0.78)***    |
| Prescription drug misuse           | 1.00 | 1.08 (0.94, 1.23)  | 0.93 (0.80, 1.07)       | 0.90 (0.78, 1.03)   | 0.91 (0.79, 1.05)   | 0.77 (0.66, 0.89)***    |
| Number of lifetime sexual partners | 0.00 | 0.02 (-0.05, 0.10) | -0.15 (-0.23, -0.08)*** | -0.02 (-0.10, 0.05) | -0.06 (-0.14, 0.01) | -0.31 (-0.39, -0.24)*** |
| Early sexual initiation            | 1.00 | 0.90 (0.76, 1.08)  | 0.69 (0.57, 0.84)***    | 1.12 (0.93, 1.33)   | 0.97 (0.79, 1.19)   | 0.84 (0.68, 1.03)       |
| History of STIs                    | 1.00 | 1.06 (0.85, 1.31)  | 0.91 (0.73, 1.14)       | 0.93 (0.75, 1.16)   | 0.87 (0.69, 1.08)   | 0.69 (0.55, 0.86)***    |
| Teen pregnancy                     | 1.00 | 0.86 (0.48, 1.55)  | 0.83 (0.46, 1.51)       | 0.94 (0.52, 1.71)   | 0.73 (0.38, 1.37)   | 1.02 (0.56, 1.84)       |
| Abnormal Pap test                  | 1.00 | 0.92 (0.78, 1.09)  | 0.89 (0.75, 1.06)       | 0.87 (0.72, 1.04)   | 1.02 (0.85, 1.22)   | 0.81 (0.67, 0.98)*      |

CI, confidence interval; OR, odds ratio; PTSD, posttraumatic stress disorder; RR, risk ratio; STIs, sexually transmitted infections.

\*P <0.05 before Bonferroni correction; \*\*P <0.01 before Bonferroni correction; \*\*\*P <0.05 after Bonferroni correction (the p value cutoff for Bonferroni correction =0.05/26 outcomes =0.0019)

<sup>a</sup> The full analytic sample was restricted to those who had valid data on frequency of religious service attendance and frequency of prayer or meditation. The actual sample size for each analysis varies depending on the number of missing values on each outcome under investigation. Missing data on the covariates were imputed from previous questionnaire years; if no such data were available, missing were imputed with the mean values (continuous variables) or values of the largest category (categorical variables) of the non-missing data.

<sup>b</sup> Religious service attendance and prayer or meditation were simultaneously included in the model as exposure variables. The effect estimates were OR (binomial distribution, rare outcome defined as the prevalence <10%), RR (Poisson distribution, non-rare event defined as prevalence ≥10%), or  $\beta$  (standardized effect size for continuous outcomes). If the reference value was “0”, this indicates the outcome was a continuous variable, and the effect estimate was  $\beta$ ; if the reference value was “1”, this indicates the outcome was a binary variable, and the effect estimate was either OR or RR, depending on the distribution of the outcome variable. All models controlled for participants’ age, race, sex, geographic region, their mother’s age, race, marital status, socioeconomic status (subjective socioeconomic status, household income, census tract college education rate, and census tract median income), maternal depression, maternal smoking, participants’ prior health status or prior health behaviors (prior depressive symptoms, overweight/obesity, smoking, drinking, marijuana use, other drug use, prescription drug misuse, number of sexual partners, early sexual initiation, history of sexually transmitted infections, history of teen pregnancy).

**Web Table 8. Prayer or meditation in adolescence and health and well-being in young adulthood, adjusting for adulthood religious service attendance in 2005 as a sensitivity analysis (Growing Up Today Study 1999 to 2007, 2010 or 2013 questionnaire wave, N ranged from 5,681 to 7,448 <sup>a</sup>)**

| Health and well-being outcomes     | Prayer or meditation          |           |             |                      |                          |           |              |                      |                            |           |             |                      |
|------------------------------------|-------------------------------|-----------|-------------|----------------------|--------------------------|-----------|--------------|----------------------|----------------------------|-----------|-------------|----------------------|
|                                    | Less than once/week vs. Never |           |             |                      | 1-6 times/week vs. Never |           |              |                      | Once/day or more vs. Never |           |             |                      |
|                                    | RR <sup>b</sup>               | $\beta^c$ | 95% CI      | P-value threshold    | RR <sup>b</sup>          | $\beta^c$ | 95% CI       | P-value threshold    | RR <sup>b</sup>            | $\beta^c$ | 95% CI      | P-value threshold    |
| <b>Psychological Well-being</b>    |                               |           |             |                      |                          |           |              |                      |                            |           |             |                      |
| Life satisfaction                  |                               | 0.03      | -0.05, 0.12 |                      |                          | 0.07      | -0.01, 0.15  |                      |                            | 0.08      | -0.00, 0.16 |                      |
| Positive affect                    |                               | 0.05      | -0.03, 0.13 |                      |                          | 0.06      | -0.01, 0.14  |                      |                            | 0.09      | 0.01, 0.17  | <0.05                |
| Self-esteem                        |                               | -0.00     | -0.09, 0.08 |                      |                          | 0.07      | -0.01, 0.15  |                      |                            | 0.05      | -0.03, 0.13 |                      |
| Emotional processing               |                               | 0.04      | -0.04, 0.13 |                      |                          | 0.12      | 0.04, 0.20   | <0.01                |                            | 0.16      | 0.08, 0.24  | <0.0019 <sup>d</sup> |
| Emotional expression               |                               | 0.09      | 0.01, 0.18  | <0.05                |                          | 0.15      | 0.07, 0.23   | <0.0019 <sup>d</sup> |                            | 0.17      | 0.09, 0.25  | <0.0019 <sup>d</sup> |
| <b>Character and Virtue</b>        |                               |           |             |                      |                          |           |              |                      |                            |           |             |                      |
| Frequency of volunteering          |                               | 0.10      | 0.03, 0.17  | <0.01                |                          | 0.18      | 0.10, 0.25   | <0.0019 <sup>d</sup> |                            | 0.19      | 0.12, 0.26  | <0.0019 <sup>d</sup> |
| Sense of mission                   |                               | 0.10      | 0.02, 0.18  | <0.05                |                          | 0.13      | 0.05, 0.21   | <0.0019 <sup>d</sup> |                            | 0.29      | 0.22, 0.37  | <0.0019 <sup>d</sup> |
| Forgiveness of others              |                               | 0.31      | 0.22, 0.40  | <0.0019 <sup>d</sup> |                          | 0.47      | 0.39, 0.55   | <0.0019 <sup>d</sup> |                            | 0.62      | 0.54, 0.70  | <0.0019 <sup>d</sup> |
| Registered to vote                 | 1.01                          |           | 0.98, 1.03  |                      | 1.00                     |           | 0.97, 1.03   |                      | 1.01                       |           | 0.99, 1.04  |                      |
| <b>Physical Health</b>             |                               |           |             |                      |                          |           |              |                      |                            |           |             |                      |
| Number of physical health problems |                               | 0.10      | 0.02, 0.18  | <0.05                |                          | 0.03      | -0.05, 0.10  |                      |                            | 0.08      | 0.01, 0.16  | <0.05                |
| Overweight/obesity                 | 1.03                          |           | 0.93, 1.14  |                      | 1.01                     |           | 0.92, 1.12   |                      | 1.02                       |           | 0.92, 1.13  |                      |
| <b>Mental Health</b>               |                               |           |             |                      |                          |           |              |                      |                            |           |             |                      |
| Depressive symptoms                |                               | -0.06     | -0.14, 0.03 |                      |                          | -0.11     | -0.19, -0.03 | <0.01                |                            | -0.03     | -0.11, 0.05 |                      |
| Depression diagnosis               | 0.96                          |           | 0.81, 1.15  |                      | 1.03                     |           | 0.87, 1.22   |                      | 1.00                       |           | 0.84, 1.19  |                      |
| Anxiety symptoms                   |                               | 0.03      | -0.05, 0.11 |                      |                          | 0.03      | -0.05, 0.10  |                      |                            | 0.08      | 0.00, 0.16  | <0.05                |
| Anxiety diagnosis                  | 1.05                          |           | 0.86, 1.29  |                      | 1.11                     |           | 0.91, 1.35   |                      | 1.13                       |           | 0.92, 1.37  |                      |
| Probable PTSD                      | 0.75                          |           | 0.55, 1.02  |                      | 1.03                     |           | 0.78, 1.35   |                      | 1.10                       |           | 0.84, 1.45  |                      |
| <b>Health Behaviors</b>            |                               |           |             |                      |                          |           |              |                      |                            |           |             |                      |
| Cigarette smoking                  | 1.04                          |           | 0.92, 1.18  |                      | 1.13                     |           | 1.01, 1.27   | <0.05                | 1.10                       |           | 0.98, 1.25  |                      |
| Frequent binge drinking            | 1.00                          |           | 0.90, 1.12  |                      | 1.08                     |           | 0.98, 1.20   |                      | 1.09                       |           | 0.98, 1.21  |                      |
| Marijuana use                      | 1.03                          |           | 1.07, 1.09  |                      | 1.02                     |           | 0.96, 1.08   |                      | 0.92                       |           | 0.86, 0.98  | <0.01                |

|                                    |      |            |             |      |            |             |      |                  |                                   |
|------------------------------------|------|------------|-------------|------|------------|-------------|------|------------------|-----------------------------------|
| Any other illicit drug use         | 1.05 | 0.85, 1.29 |             | 1.01 | 0.82, 1.24 |             | 0.88 | 0.71, 1.09       |                                   |
| Prescription drug misuse           | 0.95 | 0.83, 1.08 |             | 1.00 | 0.88, 1.13 |             | 0.90 | 0.79, 1.03       |                                   |
| Number of lifetime sexual partners |      | 0.00       | -0.07, 0.07 |      | -0.02      | -0.09, 0.04 |      | -0.19            | -0.26, -0.13 <0.0019 <sup>d</sup> |
| Early sexual initiation            | 1.07 | 0.91, 1.26 |             | 0.90 | 0.75, 1.07 |             | 0.80 | 0.67, 0.96 <.05  |                                   |
| History of STIs                    | 0.94 | 0.77, 1.15 |             | 0.88 | 0.72, 1.07 |             | 0.75 | 0.61, 0.92 <0.01 |                                   |
| Teen pregnancy                     | 0.92 | 0.52, 1.62 |             | 0.72 | 0.39, 1.32 |             | 1.04 | 0.60, 1.81       |                                   |
| Abnormal Pap test                  | 0.83 | 0.70, 0.99 | <0.05       | 0.98 | 0.84, 1.15 |             | 0.82 | 0.69, 0.97 <0.05 |                                   |

Abbreviations: RR, risk ratio; CI, confidence interval; PTSD, posttraumatic stress disorder; STIs, sexually transmitted infections.

<sup>a</sup> The full analytic sample was restricted to those who had valid data on frequency of prayer or meditation. The actual sample size for each analysis varies depending on the number of missing values on each outcome under investigation. Missing data on the covariates were imputed from previous questionnaire years; if no such data were available, missing were imputed with the mean values (continuous variables) or values of the largest category (categorical variables) of the non-missing data. All models controlled for participants' age, race, sex, geographic region, their mother's age, race, marital status, socioeconomic status (subjective socioeconomic status, household income, census tract college education rate, and census tract median income), maternal depression, maternal smoking, participants' prior health status or prior health behaviors (prior depressive symptoms, overweight/obesity, smoking, drinking, marijuana use, other drug use, prescription drug misuse, number of sexual partners, early sexual initiation, history of sexually transmitted infections, history of teen pregnancy), and frequency of religious service attendance in adulthood (never, less than weekly, at least weekly; measured at questionnaire wave 2005).

<sup>b</sup> The effect estimates for the outcomes of probable PTSD, any other illicit drug use and teen pregnancy were odds ratio (these outcomes were rare [prevalence<10%], so the odds ratio would approximate RR). The effect estimates for other dichotomized outcomes were RR.

<sup>c</sup> All continuous outcomes were standardized (mean=0, standard deviation=1), and  $\beta$  was the standardized effect size.

<sup>d</sup>  $P < 0.05$  after Bonferroni correction (the p value cutoff for Bonferroni correction=0.05/26 outcomes=0.0019).
